# Supplementary material for: Regional differences in severe postpartum hemorrhage: a nationwide comparative study of 1.6 million deliveries
Source: PubMed Central journal article supplement (PMC4341225; doi:10.1186/s12884-015-0473-8), 2015-02-21
Supplement: 12884_2015_473_MOESM1_ESM.pdf [file 12884_2015_473_MOESM1_ESM.pdf]

## Additional file

### Additional file 1 Crude incidences of PPH per region

|                        | Total | Spontaneous delivery |                       | Assisted vaginal delivery |                       | Elective CS |                       | Emergency CS |                       |
|------------------------|-------|----------------------|-----------------------|---------------------------|-----------------------|-------------|-----------------------|--------------|-----------------------|
|                        | All   | All                  | Singleton pregnancies | All                       | Singleton pregnancies | All         | Singleton pregnancies | All          | Singleton pregnancies |
|                        |       |                      |                       |                           |                       |             |                       |              |                       |
| <i>Region</i>          |       |                      |                       |                           |                       |             |                       |              |                       |
| Amsterdam <sup>a</sup> | 5.0   | 4.9                  | 4.9                   | 7.6                       | 7.4                   | 4.9         | 3.8                   | 2.6          | 2.4                   |
| Rotterdam <sup>a</sup> | 4.4   | 4.4                  | 4.3                   | 5.5                       | 5.3                   | 4.3         | 3.4                   | 3.3          | 3.2                   |
| The Hague <sup>a</sup> | 5.4   | 5.1                  | 5.0                   | 7.6                       | 7.3                   | 6.4         | 5.5                   | 4.2          | 4.0                   |
| Utrecht <sup>a</sup>   | 4.8   | 4.8                  | 4.6                   | 5.9                       | 5.7                   | 4.8         | 4.1                   | 3.1          | 2.6                   |
| Groningen              | 3.7   | 3.4                  | 3.3                   | 4.8                       | 4.5                   | 3.7         | 3.3                   | 3.0          | 2.9                   |
| Friesland              | 3.8   | 3.6                  | 3.4                   | 6.0                       | 5.8                   | 2.9         | 2.4                   | 3.1          | 3.1                   |
| Drente                 | 3.8   | 3.8                  | 3.7                   | 6.3                       | 6.1                   | 2.9         | 2.4                   | 1.5          | 1.4                   |
| Overijssel             | 3.5   | 3.3                  | 3.2                   | 5.4                       | 5.2                   | 3.1         | 2.4                   | 2.6          | 2.5                   |
| Gelderland             | 4.7   | 4.3                  | 4.2                   | 6.7                       | 6.4                   | 6.0         | 5.2                   | 4.9          | 4.6                   |

|              |     |     |     |     |     |     |     |     |     |
|--------------|-----|-----|-----|-----|-----|-----|-----|-----|-----|
| Utrecht      | 4.2 | 4.1 | 4.0 | 5.7 | 5.4 | 4.3 | 3.7 | 2.6 | 2.1 |
| Noord        |     |     |     |     |     |     |     |     |     |
| Holland      | 4.9 | 4.8 | 4.7 | 7.9 | 7.7 | 3.4 | 2.7 | 2.1 | 2.0 |
| Zuid Holland | 4.6 | 4.5 | 4.4 | 6.3 | 6.1 | 4.5 | 3.6 | 3.8 | 3.6 |
| Zeeland      | 4.2 | 3.5 | 3.4 | 6.8 | 6.6 | 6.8 | 6.2 | 4.5 | 4.5 |
| Noord        |     |     |     |     |     |     |     |     |     |
| Brabant      | 4.6 | 4.5 | 4.4 | 6.3 | 6.1 | 4.4 | 3.8 | 3.6 | 3.3 |
| Limburg      | 4.2 | 4.3 | 4.2 | 5.9 | 5.7 | 2.7 | 2.2 | 2.0 | 1.8 |
| Flevoland    | 4.6 | 4.7 | 4.6 | 5.2 | 5.1 | 4.5 | 3.7 | 2.4 | 2.2 |
| <i>Total</i> | 4.5 | 4.3 | 4.2 | 6.4 | 6.2 | 4.3 | 3.5 | 3.2 | 3.0 |

---

<sup>a</sup>City

CS = cesarean section
