# Supplementary material for: Regional differences in severe postpartum hemorrhage: a nationwide comparative study of 1.6 million deliveries
Source: PubMed Central journal article supplement (PMC4341225; doi:10.1186/s12884-015-0473-8), 2015-02-21
Supplement: 12884_2015_473_MOESM2_ESM.pdf [file 12884_2015_473_MOESM2_ESM.pdf]

**Additional file 2** Crude incidences of PPH in Amsterdam

|                     | Total |     | Spontaneous |           | Assisted vaginal |           | Elective CS |           | Emergency CS |           |
|---------------------|-------|-----|-------------|-----------|------------------|-----------|-------------|-----------|--------------|-----------|
|                     | All   |     | All         | Singleton | All              | Singleton | All         | Singleton | All          | Singleton |
|                     |       |     | pregnancies |           | pregnancies      |           | pregnancies |           | pregnancies  |           |
| <i>Neighborhood</i> |       |     |             |           |                  |           |             |           |              |           |
| Centrum             | 5.4   | 5.6 | 5.6         | 7.5       | 7.6              | 4.4       | 4.0         | 2.4       | 2.4          |           |
| de Baarsjes         | 4.7   | 4.6 | 4.5         | 10.4      | 10.0             | 3.2       | 0.6         | 1.0       | 1.0          |           |
| Bos en Lommer       | 5.0   | 5.2 | 5.1         | 8.3       | 8.0              | 2.9       | 1.3         | 0.9       | 0.9          |           |
| Geuzenveld-         |       |     |             |           |                  |           |             |           |              |           |
| Slotermeer          | 4.1   | 4.4 | 4.3         | 5.9       | 5.6              | 1.6       | 1.1         | 1.5       | 1.5          |           |
| Noord               | 4.4   | 3.6 | 3.5         | 6.7       | 6.5              | 8.9       | 7.6         | 5.3       | 5.1          |           |
| Osdorp              | 5.2   | 5.3 | 5.2         | 9.9       | 9.8              | 2.4       | 1.1         | 1.4       | 1.2          |           |
| Oud-West            | 5.6   | 5.9 | 6.2         | 7.3       | 7.0              | 3.5       | 3.9         | 2.7       | 3.1          |           |
| Oud-Zuid            | 5.5   | 5.8 | 5.6         | 7.9       | 7.5              | 4.1       | 2.1         | 1.6       | 1.5          |           |
| Oost-               |       |     |             |           |                  |           |             |           |              |           |
| Watergraafsmeer     | 4.8   | 4.5 | 4.4         | 8.0       | 7.8              | 5.1       | 3.2         | 3.5       | 3.4          |           |

|              |     |     |     |     |     |     |     |     |     |
|--------------|-----|-----|-----|-----|-----|-----|-----|-----|-----|
| Slotervaart  | 5.1 | 5.3 | 5.3 | 9.3 | 9.0 | 2.6 | 0.4 | 0.8 | 0.8 |
| Westerpark   | 6.0 | 6.4 | 5.9 | 8.5 | 7.6 | 3.4 | 1.4 | 1.4 | 1.1 |
| Westpoort    | 4.4 | 4.6 | 4.4 | 5.6 | 5.2 | 3.3 | 3.5 | 2.0 | 2.1 |
| Zeeburg      | 4.8 | 4.9 | 4.7 | 6.7 | 6.6 | 4.6 | 4.1 | 2.6 | 2.4 |
| Zuideramstel | 5.2 | 5.1 | 5.1 | 9.4 | 9.4 | 3.6 | 1.6 | 2.2 | 1.7 |
| Zuid Oost    | 4.7 | 4.6 | 4.5 | 3.8 | 3.7 | 8.1 | 7.9 | 3.8 | 3.7 |
| <i>Total</i> | 5.0 | 4.9 | 4.9 | 7.6 | 7.4 | 4.9 | 3.7 | 2.5 | 2.4 |

---

CS = cesarean section
