# Supplementary material for: Regional differences in severe postpartum hemorrhage: a nationwide comparative study of 1.6 million deliveries
Source: PubMed Central journal article supplement (PMC4341225; doi:10.1186/s12884-015-0473-8), 2015-02-21
Supplement: 12884_2015_473_MOESM3_ESM.pdf [file 12884_2015_473_MOESM3_ESM.pdf]

**Additional file 3** Crude incidences of PPH in Rotterdam

|                     | Total |     | Spontaneous |      | Assisted vaginal |     | Elective CS |     | Emergency CS |  |
|---------------------|-------|-----|-------------|------|------------------|-----|-------------|-----|--------------|--|
|                     | All   | All | Singleton   | All  | Singleton        | All | Singleton   | All | Singleton    |  |
|                     |       |     | pregnancies |      | pregnancies      |     | pregnancies |     | pregnancies  |  |
| <i>Neighborhood</i> |       |     |             |      |                  |     |             |     |              |  |
| Stadscentrum        | 4.5   | 4.2 | 4.2         | 6.0  | 6.1              | 5.7 | 4.5         | 3.8 | 3.9          |  |
| Charlois            | 4.2   | 4.0 | 3.8         | 5.3  | 5.0              | 3.8 | 2.8         | 4.5 | 4.4          |  |
| Delfshaven          | 4.1   | 4.0 | 3.9         | 4.1  | 4.2              | 4.4 | 3.7         | 4.9 | 5.0          |  |
| Feijenoord          | 3.7   | 3.8 | 3.8         | 4.2  | 4.2              | 3.3 | 3.0         | 2.1 | 2.0          |  |
| Hilligersberg       |       |     |             |      |                  |     |             |     |              |  |
| Schiebroek          | 5.8   | 6.2 | 6.2         | 7.1  | 7.1              | 3.8 | 3.6         | 1.4 | 1.4          |  |
| Hoogvliet           | 5.0   | 5.0 | 4.9         | 5.8  | 4.9              | 4.6 | 3.9         | 3.6 | 3.3          |  |
| Hoek van Holland    | 5.0   | 4.4 | 4.5         | 12.1 | 9.5              | 3.1 | 3.3         | 3.9 | 4.0          |  |
| Ijsselmonde         | 4.2   | 4.5 | 4.3         | 4.5  | 4.6              | 4.0 | 2.8         | 1.2 | 1.0          |  |
| Kralingen Crooswijk | 4.4   | 4.4 | 4.3         | 5.8  | 5.6              | 4.4 | 3.4         | 2.9 | 2.7          |  |
| Noord               | 4.4   | 4.4 | 4.3         | 6.5  | 6.0              | 1.8 | 1.9         | 2.3 | 2.4          |  |

|              |     |     |     |     |     |     |     |     |     |
|--------------|-----|-----|-----|-----|-----|-----|-----|-----|-----|
| Overschie    | 5.1 | 5.6 | 5.5 | 5.2 | 4.7 | 3.3 | 3.5 | 0.8 | 0.9 |
| Pr Alexander | 4.8 | 4.3 | 4.3 | 6.1 | 6.0 | 6.6 | 4.7 | 4.9 | 4.7 |
| Pernis       | 5.0 | 5.1 | 4.8 | 8.2 | 8.5 | 4.6 | 0   | 0   | 0   |
| <i>Total</i> | 4.4 | 4.4 | 4.3 | 5.5 | 5.3 | 4.3 | 3.4 | 3.3 | 3.2 |

---

CS = cesarean section
